# Supplementary material
Source: Copernicus journal article supplement (doi:10.5194/bg-23-3735-2026)
Supplement: Supplementary file 1 [file bg-23-3735-2026-supplement.pdf]

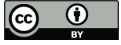

*Supplement of*

## **The impact of large-scale macroalgae cultivation and harvesting strategies on the marine carbon dioxide removal efficacy and marine biogeochemistry**

**Prima Anugerahanti et al.**

*Correspondence to:* Prima Anugerahanti (prianu@noc.ac.uk)

The copyright of individual parts of the supplement might differ from the article licence.

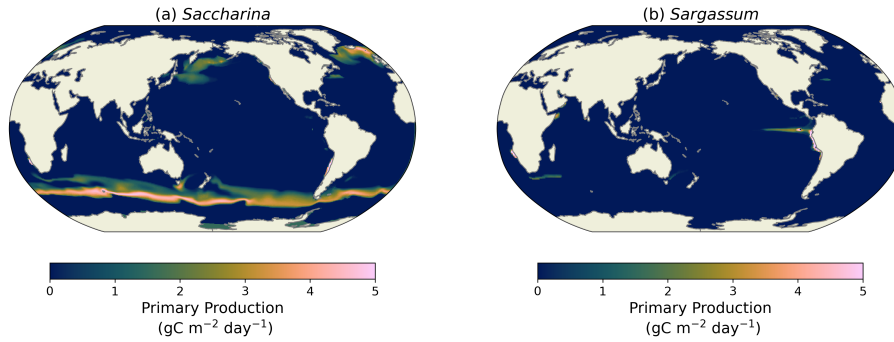

Figure S1: Macroalgae Net Primary Production (NPP) of (a) *Saccharina* and (b) *Sargassum* from the default experiment averaged between 2015-2024. Other species concentrations are not shown since these are in very small concentrations

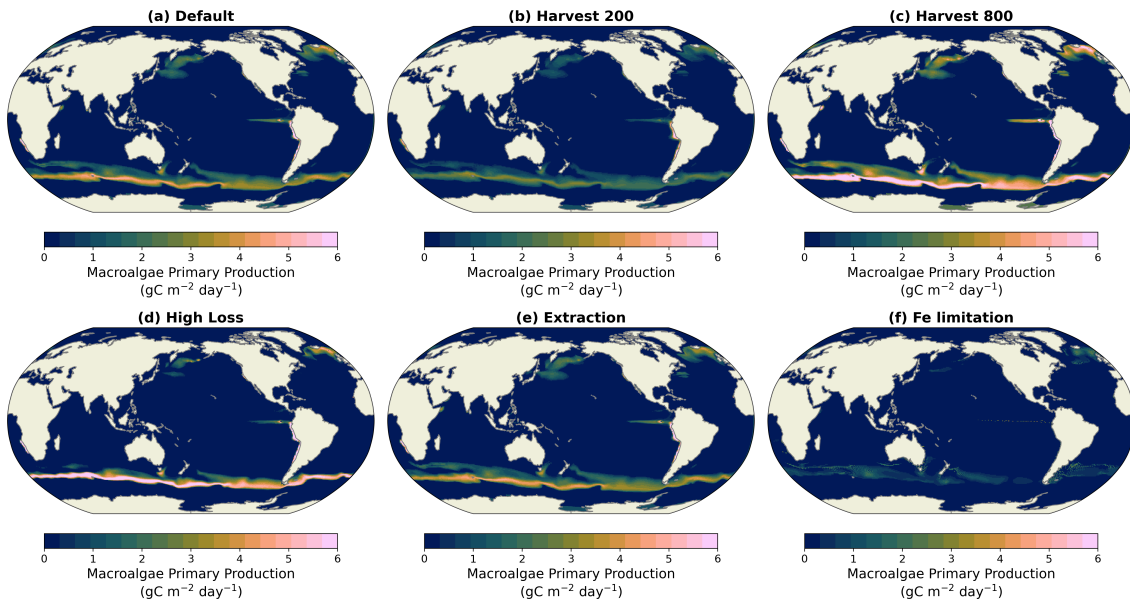

Figure S2: Macroalgae NPP of (a) default, (b) Harvest 200, (c) Harvest 800, (d) High Loss, (e) Extraction, and (f) Fe Limitation. These results are averaged between 2015-2024. Please refer to Table 2 in the main text for experiment name.

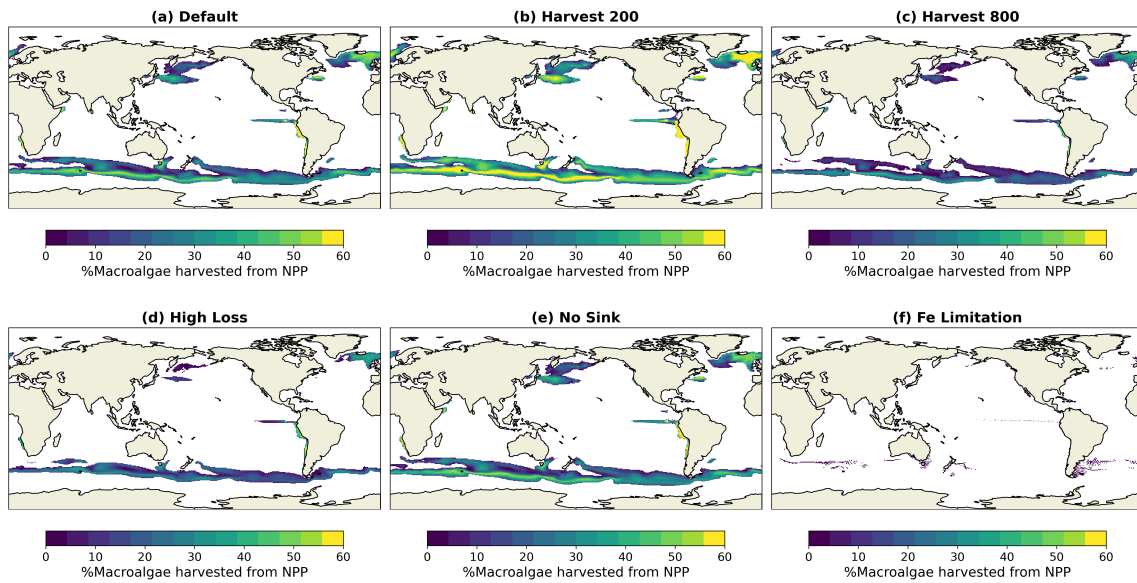

Figure S3: Proportion of harvest compared to macroalgae NPP from different experiments; (a) default, (b) Harvest 200, (c) Harvest 800, (d) High Loss, (e) Extraction, and (f) Fe Limitation.

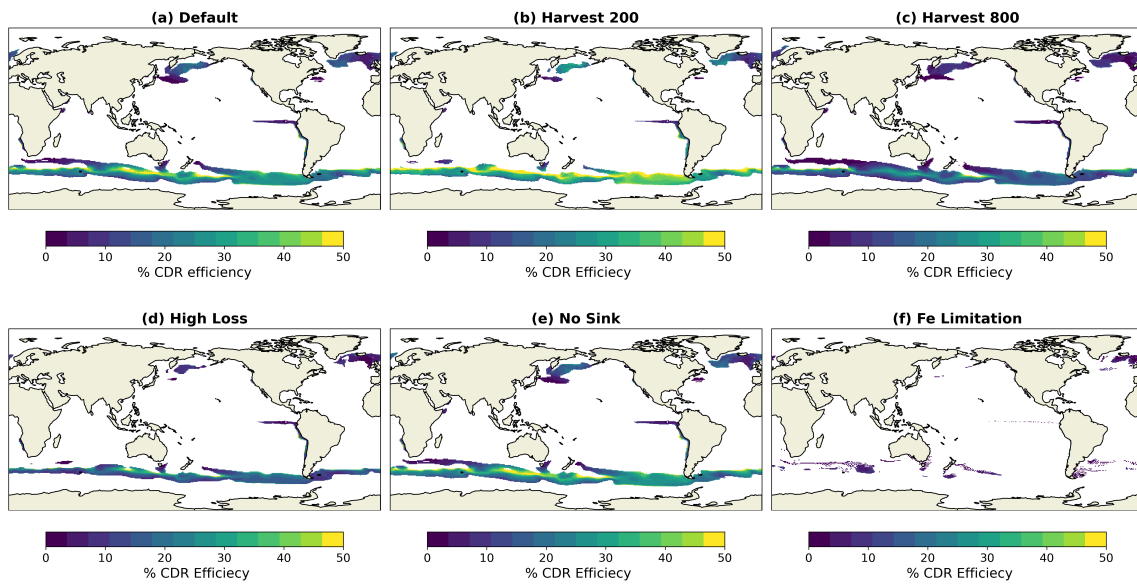

Figure S4:  $CDR_{eff}$  NPP from different experiments; (a) default, (b) Harvest 200, (c) Harvest 800, (d) High Loss, (e) Extraction, and (f) Fe Limitation. These are calculated from the fraction of additional  $CO_2$  flux from macroalgae NPP

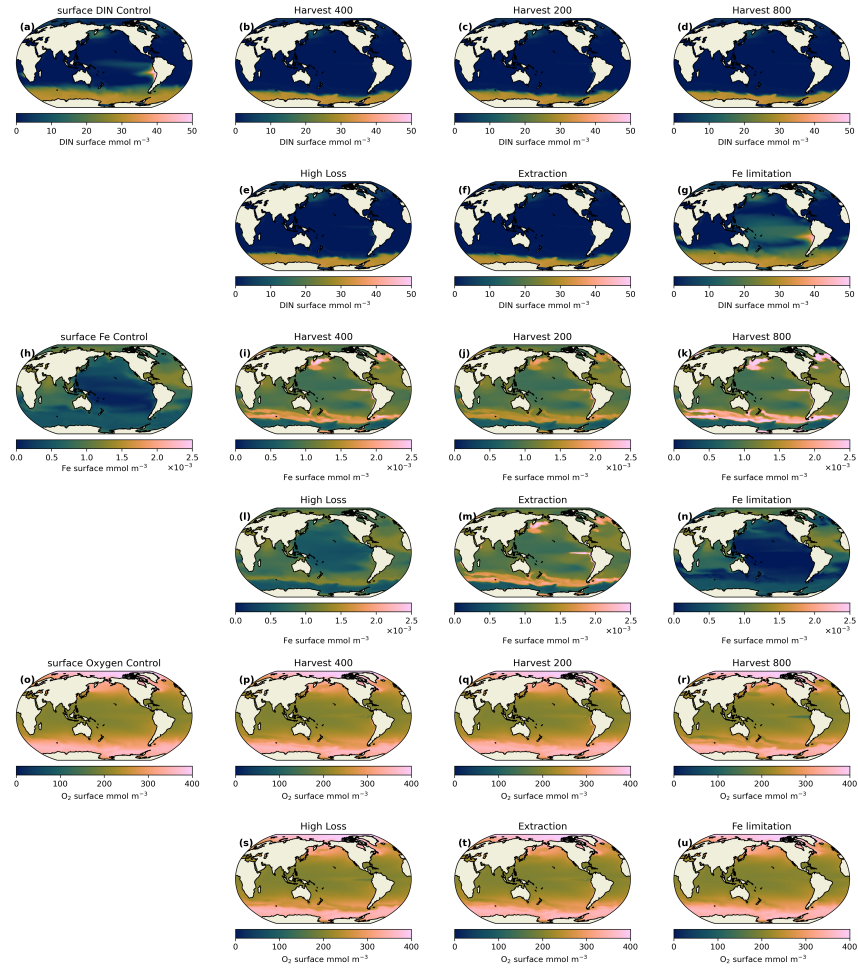

Figure S5: Surface nutrients and oxygen. Dissolved inorganic nitrogen (DIN) 2015-2024 averages from the control and other experiments are shown in a-g, iron (Fe) in h-n, and Oxygen in o-u. The first column (a,h,o) shows the control simulation. The odd number rows show the harvest experiment, while the even rows show high loss, extraction, and Fe limitation experiments.

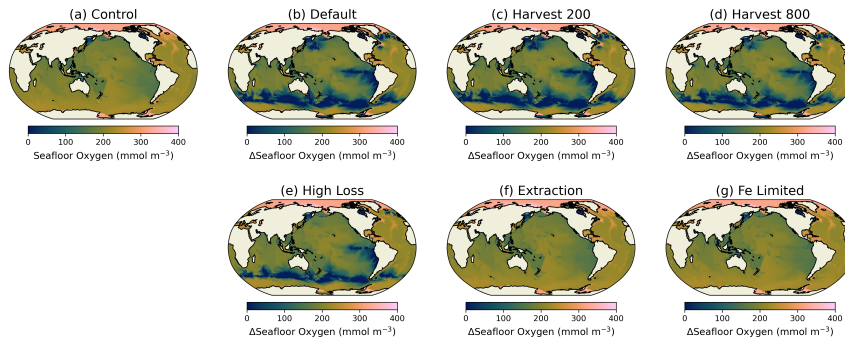

Figure S6: Seafloor oxygen concentration from the control simulation (a) and other macroalgae experiments. c and d show harvesting experiments and e,f,g show high non-harvesting loss, not sinking harvested macroalgae, and not supplementing iron, respectively.

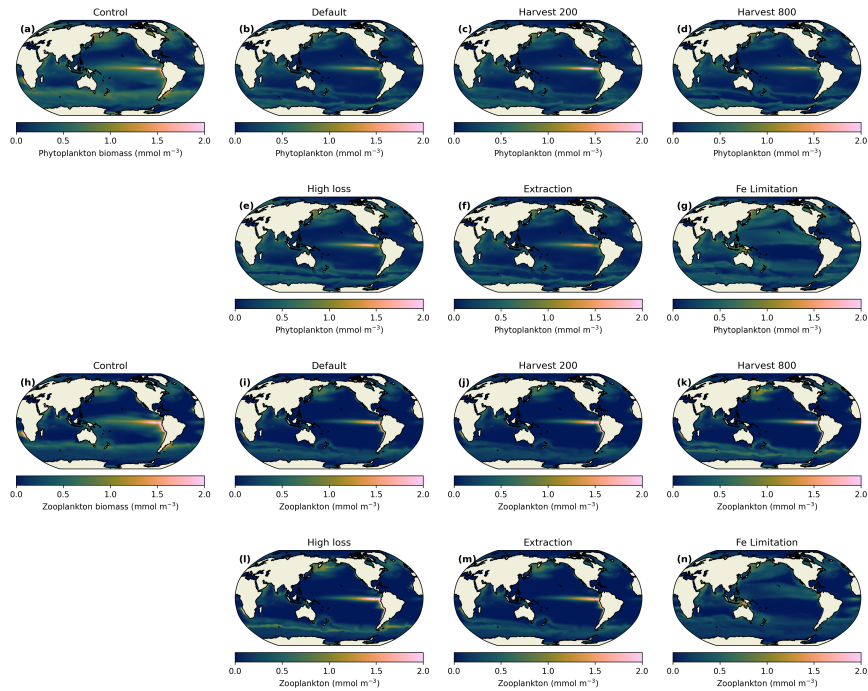

Figure S7: Phytoplankton (a-g) and zooplankton biomass (h-n) from control simulation and other macroalgae experiments. These are arranged similarly to Figures S5 and S6

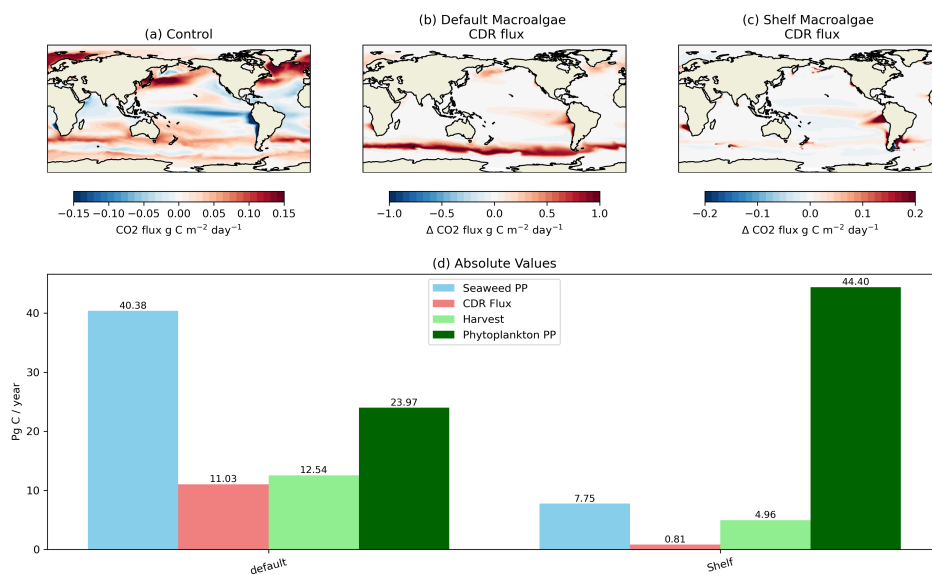

Figure S8: Global macroalgal cultivation and its influence on air-sea CO<sub>2</sub> flux between the default experiment and when macroalgae is grown only on the shelf sea area (depth < 200m). Top panel shows CO<sub>2</sub> flux for the control (a), and the difference between control and default macroalgae run (b), and shelf sea macroalgae simulation (c). Bottom panel shows the absolute values of macroalgae primary production, phytoplankton primary production, CDR flux, and harvest between the two macroalgae simulations (d).
